# Supplementary material
Source: Elsevier journal article supplement (https://www.sciencedirect.com/science/article/pii/S0212656721000275)
Supplement: mmc1 [file S0212656721000275:mmc1.docx]

**Anexos**

**Anexo A**: RESUMEN DE LOS OBJETIVOS DE TRABAJO Y DESCRIPCIÓN DE LA ACTIVIDAD REALIZADA

| **FASE** | **OBJETIVOS** | **DESCRIPCIÓN DE LA ACTIVIDAD REALIZADA** |
| --- | --- | --- |
| **FASE 1:**  Visión individual y grupal del objetivo y características de la herramienta de VMGR. | Trabajo individual *online* para identificar y consensuar:   - El **Grupo poblacional** objetivo. - Las **Dimensiones/variables** necesarias. - La **Sistemática/metodología** para la valoración de las dimensiones/variables descritas. - La **Metodología** (cuali/cuantitativa) al diagnóstico situacional y la mejor **fuente** de obtención de los datos. | **Trabajo individual (*online*):** cada participante cumplimentó un cuestionario (anexo B) reflejando su visión sobre los objetivos del proyecto.  El equipo consultor analizó los resultados de forma independiente, y los estructuró para orientar el trabajo grupal posterior. |
| Consensuar a nivel grupal las **características** de la herramienta de VMGR y **metodología** del desarrollo:   - El **propósito** (el ¿por qué? y ¿para qué? del proyecto): Los objetivos del proyecto fueron consensuados por el grupo con el fin de reducir cualquier variabilidad en la comprensión. - El **producto**: Se realizó un trabajo de consenso mediante votación, tanto sobre la población-objetivo de la herramienta como de las características de la misma. - El **proceso**, en referencia a la definición de los siguientes pasos para continuar avanzando en la identificación de la herramienta ideal de VMGR. | En base al trabajo individual (fase 1), se discutió en la **primera reunión presencial** sobre el propósito, el producto y el proceso:   - El **propósito del proyecto:** se dividió el grupo de trabajo en dos equipos, con el objetivo de concretar el propósito del proyecto en una frase por grupo, y posteriormente en una única frase de consenso. - Las **características del producto**: se utilizó un sistema de votación presencial (anexo C) y posterior discusión. - El **proceso**: a partir de los resultados obtenidos, se decidió realizar una revisión de la bibliografía con el fin de identificar herramientas que se ajustara a las características definidas por el grupo. |
| Búsqueda y consenso de una **herramienta** de VMGR:   - Revisión de las herramientas de VMGR publicadas hasta la actualidad. - Comparativa de las herramientas con el objetivo de identificar si alguna de ellas se ajusta a los requisitos consensuados. | - Los coordinadores del proyecto realizaron una **revisión narrativa** de las herramientas publicadas, que compartieron con los participantes (a los que también se invitó a aportar bibliografía y otras herramientas de uso habitual), para su valoración. - El resultado se discutió en la segunda reunión presencial. |
| **FASE 2:**  Diseño de una nueva herramienta de VMGR | Desarrollo del **prototipo** de nueva herramienta de VMGR:   - Consensuar las preguntas *trigger* para la detección de déficits para cada una de las dimensiones contempladas en la herramienta de VMGR ideal. - Diseño de un “mínimo producto viable” que se pudiera administrar en un tiempo corto como nueva herramienta de VMGR, en base a las preguntas *trigger* consensuadas. | - El **consenso de las preguntas *trigger*** se realizó mediante el trabajo *online* con todos los participantes mediante un cuestionario Delphi. - A partir del prototipo inicial surgido del trabajo online, en la segunda reunión presencial se estableció el consenso de un **prototipo** de herramienta de VMGR. |
| **FASE 3:**  Testeo del prototipo de VMGR y consenso de la herramienta final de VMGR | **Testeo** del **prototipo** de VMGR:   - Testear, en la práctica asistencial real, algunas características psicométricas básicas del nuevo instrumento. | - El prototipo propuesto fue **utilizado** por distintos miembros del grupo de expertos en su **práctica asistencial.** - Paralelamente rellenaron un cuestionario que incluía variables relacionadas con la aplicabilidad de la herramienta (tiempo de duración, problemas de comprensión del paciente o cuidador, orden de las dimensiones u otros comentarios) |
| **Consenso final** de herramienta de VMGR   - Consenso de la versión definitiva de la herramienta de VMGR (VIG-express). | - Mediante las valoraciones obtenidas en la fase anterior, se realizó una tercera y última reunión presencial para consensuar la versión definitiva del instrumento. |

VMGR: valoración multidimensional/geriátrica rápida

**Anexo B**. LISTADO DEL GRUPO DE PARTICIPANTES EXPERTOS y COORDINADORES (por orden alfabético).

**COORDINADORES DEL PROYECTO:**

**JA** Médico geriatra. [blinded for review]

**CB** Enfermera de Residencia. [blinded for review]

**JCC** Enfermero de Atención Primaria. [blinded for review]

**DK** [blinded for review] Health Consulting

**SS** Médico Internista. [blinded for review]

**LR** [blinded for review] Health Consulting

**GRUPO EXPERTOS/PANELISTAS:**

**JA** Médico internista. [blinded for review]

**EB**  Médico de familia. [blinded for review]

**CB** Médico de familia. [blinded for review]

**NC** Médico de familia. [blinded for review]

**SD** Enfermera de Atención Primaria. [blinded for review]

**MD**  Trabajadora Social. [blinded for review]

**MD** Médico geriatra. [blinded for review]

**ME** Médico paliativista. [blinded for review].

**PF** Enfermera geriátrica. [blinded for review]

**AF** Enfermera de Cuidados Paliativos. [blinded for review]

**DG** Médico de familia. Servicio de Urgencias. [blinded for review]

**MGP** Trabajadora Social. [blinded for review]

**NG** Médico de familia. [blinded for review]

**MAL** Médico de familia. [blinded for review].

**NL**  Médico de Urgencias. [blinded for review]

**EL**  Trabajadora Social. [blinded for review]

**AM**  Médico geriatra. [blinded for review]

**MAM** Médico geriatra. [blinded for review]

**JMP** Médico paliativista. [blinded for review]

**PP** Enfermera de Atención Primaria. [blinded for review]

**ER**  Trabajadora Social. [blinded for review]

**AS** Enfermera geriátrica. [blinded for review].

**LS** Trabajador social sanitario. [blinded for review]

**MS** Enfermera geriátrica. [blinded for review]

**DT** Enfermero de Atención Primaria. [blinded for review]

**AV** Trabajadora Social. [blinded for review]

**JZ** Enfermero de Atención Primaria. [blinded for review]

**Anexo C.** OPINIÓN DE LOS PROFESIONALES EXPERTOS (Fase 1). Trabajo individual.

| **PREGUNTA** | **RESPUESTAS MÁS REPETIDAS** |
| --- | --- |
| ¿A QUÉ GRUPO DE POBLACIÓN SE DEBERÍA ORIENTAR LA VALORACIÓN MULTIDIMENSIONAL? | Personas de **65-70-80 o más años en los que se haya observado algún cambio** en su situación de salud (a nivel clínico, psicológico o social) que haya ocasionado una disminución de su grado de autonomía personal. Po- dría ser personas valoradas de dependencia y que no llegan a tener grado reconocido (no llegan a los 25 puntos sobre un máximo de 100 puntos). |
| Pacientes con **riesgo de fragilidad a corto plazo**: mayores de 65 años y crónicos complejos. |
| Pacientes con fragilidad detectada. |
| Pacientes con hospitalización reciente. |
| Pacientes con **polifarmacia.** |
| Pacientes con estado nutricional deficiente. |
| Pacientes con carencias en soporte social. |
| Pacientes con síndrome geriátrico. |
| Población de **más de 65 años** que haga una consulta a los servicios sociales. |
| No directamente asociadas a la edad. |
| Pacientes con **multimorbilidad**, enfermedades de alto impacto en calidad de vida y riesgo social. |
| Pacientes de edad avanzada y/o situación final de vida (crónicos o agudos). |
| Personas con déficits cognitivo + multimorbilidad. |
| Pacientes crónicos sin complejidad. |
| Que presenten **más de 2 ítems**:  1. Personas > 85 años.  2. Personas con patología crónica compleja y/o con necesidad de aten- ción paliativa.  3. Personas con síndromes geriátricos como motivo de consulta.  4. Personas con dependencia funcional y/o cognitiva.  5. Personas que viven solas o a residencias, o cuidador principal con poca capacidad para cuidar. |
| ¿QUÉ DIMENSIONES/VARIABLES DEBERÍA INCORPORAR NECESARIAMENTE UNA HERRAMIENTA DE VMGR PARA EL GRUPO DESCRITO? | Funcionales |
| Cognitivas |
| Emocionales |
| **Clínicas**: especialmente síndromes geriátricos (hipoacusia, disminución agudeza visual, caídas, disfagia, dolor, úlceras de decúbito, estreñimiento, disnea, síndrome confusional, polifarmacia, malnutrición, insomnio). |
| **Sociales**: recursos de los que dispone la persona a nivel relacional (familiares de apoyo, proyecto de vida personal adecuado, etc.), así como otros aspectos como vivienda, recursos económicos, etc.); recursos que existen en la comunidad y las posibilidades de acompañamiento a la persona. |
| GMA. |
| VGI. |
| **Valoración con distintas herramientas**: Índice de Fragilidad (Frágil-VIG) + Escala de Valoración Socio-Familiar de Gijón (TSO) + Catalogado de PCC/ MACA. |
| **Uso de recursos sanitarios** (Atención Domiciliaria de Atención Primaria, Pro- grama de Apoyo a la Atención Primaria, Urgencias Hospitalarias, ingreso hospitales agudos, ingreso centro sociosanitario, hospital de día), y sociales (SAD, centro de día, teleasistencia, número de visitas con la trabajadora so- cial, programa de ayudas técnicas) en el último año. |
| **Valores y preferencias de la persona**: información que tiene la persona, opinión sobre su situación y sus objetivos personales, capacidad para tomar decisiones o para delegarlas. |
| Estado nutricional. |
| Identificación cuidador principal: capacidad y validez de éste. |
| Deprivación sensorial. |
| Grado de dependencia reconocido o no. |
| ¿QUÉ SISTEMÁTICA/METODOLOGÍA PROPONDRÍAS PARA VALORAR CADA UNA DE LAS DIMENSIONES DESCRITAS? | **Preguntas trigger** para la mayoría de dimensiones. Para la fragilidad, alguna prueba sencilla como la velocidad de la marcha o la escala FRAIL. |
| **Preguntas trigger** simples que actúan como identificador de dimensión afectada, que pueda dirigir al protocolo de valoración complementaria. Permitir valoraciones más específicas; plan individualizado. |
| Las **escalas** permitirían posicionar/puntuar el nivel de evaluación, y las **preguntas trigger** para orientar en las decisiones. |
| **Escalas** que permitan obtener una **puntuación final** (por ejemplo: Índices de Fragilidad; la Self Sufficiency Matrix, en la que cada puntuación, en una escala de 5 a 1, se asocia a unos indicadores que son frases descriptivas). |
| ¿CUÁL DEBERÍA SER LA FUENTE DE DATOS Y CUÁL SERÍA LA MEJOR APROXIMACIÓN AL DIAGNÓSTICO SITUACIONAL? | **Fuentes de datos:**  -Mediante una valoración individualizada y presencial por parte de diferentes profesionales tanto de salud como de servicios sociales.  -Un buen sistema de valoración tendría que combinar una parte de la in- formación recogida en sistemas de información de forma estructurada y sistemática (resultando imprescindible que la información esté rellenada, y actualizada y accesible para todos los profesionales implicados), y otra de valoración individualizada resultado de la valoración de los diferentes profesionales.  -Incorporando un Índice de fragilidad realizado previamente. |
| **Aproximación al diagnóstico situacional:**  -Gran ventaja de la aproximación cuantificable (si fuera posible).  -Idealmente mixta: para tener las ventajas de la cualitativa (ofrecer información exhaustiva y matizada y dejar un espacio al criterio del profesional), y obtener al mismo tiempo resultados cuantitativos. |

**Anexo D.** CONSENSO DE LOS PROFESIONALES EXPERTOS EN LA fase 1

| **CARACTERÍSTICAS** | **PROPUESTA** | **VOTOS OBTENIDOS/ RESULTADOS** | **CONSENSO** |
| --- | --- | --- | --- |
| GRUPO DE POBLACIÓN | Personas de **65-70-80 o más años en los que se haya observado algún cambio** en su situación de salud (a nivel clínico, psicológico o social) que haya ocasionado una disminución de su grado de autonomía personal. Podría ser personas valoradas de dependencia y que no llegan a tener grado reconocido (no llegan a los 25 puntos sobre un máximo de 100 puntos). | 14 | La herramienta debía ser tanto preventiva como diagnóstica. La detección más votada fue del tipo oportunista. No se alcanzó consenso en un solo perfil y se decidió posponer su definición. |
| Que presenten **más de 2 ítems**:  -personas > 85 años; personas con patología crónica compleja y/o con necesidad de atención paliativa. -personas con síndromes geriátricos como motivo de consulta. -personas con dependencia funcional y/o cognitiva. -personas que viven solas o en residencias, o cuidador principal con poca capacidad para cuidar. | 13 |
| Pacientes con **multimorbilidad**, enfermedades de alto impacto en calidad de vida y riesgo social. | 12 |
| Pacientes con **riesgo de fragilidad** a corto plazo: mayores de 65 años y crónicos complejos | 10 |
| DIMENSIONES/VARIABLES PARA EL GRUPO POBLACIONAL DESCRITO | Funcional | 14 |  |
| Social | 14 |  |
| Cognitiva | 13 |  |
| Emocional | 5 |  |
| Enfermedades y síndromes geriátricos | 5 |  |
| Valores y preferencias de la persona | 5 |  |
| SISTEMÁTICA/METODOLOGÍA PARA VALORAR LAS DIMENSIONES DESCRITAS, FUENTES DE DATOS Y APROXIMACIÓN AL DIAGNÓSTICO SITUACIONAL | Fuentes de datos | **Sistemas de información:**  Ventaja: Sistema automatizable Inconveninete: es necesario que esté actualizado | La fuente de datos ha de ser ad hoc e individualizada por cada paciente. Debe combinarse con las fuentes de datos informatizados ya existentes (mixta) asegurando que están actualizados. |
|  | **Valoración individualizada “Ad Hoc”:** Ventaja: está actualizada en el momento preciso. Inconveniente: requiere una inversión de tiempo. |
| Aproximación al diagnóstico situacional | **Cualitativa:**  Se exploran por separado las diferentes dimensiones, no existe una valoración final global cuantificada para el diagnóstico situacional de la persona. | La aproximación al diagnóstico situacional debe ser cuantitativa, aunque con los siguientes matices:  - fuentes cualitativas donde se valoren dimensiones sociales, emocionales, etc. - a partir de preguntas sí/no que orienten al diagnóstico - la escala cuantitativa debe proceder de una valoración cualitativa que se traduzca a valores numéricos |
|  | **Cuantificada:** A partir de la exploración de diferentes dimensiones, se obtiene además un resultado numérico global. |
| **Sistemática / metodología** de valoración de las dimensiones | Ver resultados en Tabla Resultados Sistemática / metodología de valoración de las dimensiones | Priorizar una propuesta basada en preguntas *trigger* frente a la utilización de múltiples escalas para valorar cada dimensión |

**Anexo E**. PROPUESTAS DE PREGUNTAS *TRIGGER* (Trabajo *online* -Fase 2)

| **CATEGORÍA** | **PREGUNTA *TRIGGER*** | **RESPUESTAS** |
| --- | --- | --- |
| **Funcional ABVDs** | ¿Podría vivir solo/a en su domicilio? | SI/ CON ALGUNA AYUDA/ NO |
| ¿Es autónomo en el manejo de la medicación? | AUTÓNOMO/ DEPENDENCIA PARCIAL/ DEPENDENCIA TOTAL |
| ¿Es autónomo para el manejo del dinero? | AUTÓNOMO/ DEPENDENCIA PARCIAL/ DEPENDENCIA TOTAL |
| ¿És autónomo para la utilización del teléfono? | AUTÓNOMO/ DEPENDENCIA PARCIAL/ DEPENDENCIA TOTAL |
| Test de Barthel | 70-90 DEPENDECIA LEVE |
| Barthel (no pondría pregunta *trigger*) | 40-70 DEPENDENCIA MODERADA |
| Índice de Barthel (ver propuesta índice VIG) | <40 DEPENDENCIA SEVERA |
| Igual que índice VIG | VALOR |
| A nivel personal, ¿necesita ayuda para ducharse, vestirse, uso del WC? | SI/NO |
| ¿Tiene dificultades para realizar una o más de estas actividades? Alimentarse, Vestirse, Desplazarse | SI, PARA MÁS DE UNA/ SI, SOLO PARA UNA/ NO (AUNQUE LAS HAGA CON AYUDA DE OTRA PERSONA O AYUDA TÉCNICA) |
| Control de la higiene personal, incluido control de orina y heces |
| ¿Es autónomo para las actividades básicas? | SI/NO |
| ¿Va necesitando el paciente ayuda para las actividades básicas? |  |
| ¿Es capaz de asearse con independencia? | SI/NO |
| ¿Se puede vestir solo? | SI/NO |
| ¿Se puede prepara la comida usted? | SI/NO |
| ¿Tiene dificultades de movilidad, para vestirse o asearse? | EN NINGUNA/ EN UNA/ EN DOS/ EN LAS TRES |
| **NUTRICIONAL** | **¿Ha perdido ≥ 5% de peso en los últimos 6 meses?** | SI/NO |
| **¿Pérdida 5% o más peso corporal últimos 6 meses?** | SI/NO |
| **¿Ha perdido peso?** | SI/NO |
| ¿Ha perdido o ganado peso de forma visible en el último trimestre? | SI/NO |
| ¿Pérdida de peso reciente (< 3 meses)? | Elección múltiple: |
| (3) Pérdida de peso > 3Kg. |
| (2) No lo sabe. |
| (1) Pérdida de 1-3 kg |
| (0) No ha perdido peso |
| ¿Se deja parte de la comida sin comer? | Indicar frecuencia |
| ¿Ha perdido el apetito en los últimos 6 meses? |  |
| ¿Refiere pérdida de apetito o pérdida? |
| ¿Tiene anorexia? | SI/NO |
| ¿Puede cocinar? | SI/NO |
| ¿Cuantas veces come al día? | >3 CORRECTA |
| ¿Cuántas comidas hace al día? | ABIERTA |
| ¿Tiene apetito habitualmente? | SI/NO |
| ¿Considera que come de todo (fruta, verdura, carne o pescado) en cantidad adecuada? | SI/NO |
| ¿Cómo de todos los grupos de alimentos?’ | ABIERTA |
| ¿Habitualmente cuantas comidas hace diariamente? | UNA/ DOS/ TRES/ MÁS DE TRES |
| ¿Qué suele desayunar, comer y cenar? | DICOTOMICA |
| VALORAR SI ES ALIMENTACIÓN VARIADA |
| SI/NO |
| ¿Tiene capacidad para autogestionarse una alimentación adecuada? | SI/NO |
| ¿Se atraganta con facilidad? | SI/NO |
| **COGNITIVO** | **¿Tiene problemas importantes de memoria? Si la respuesta es SI contestar las siguientes preguntas: ¿Puede vivir solo/a en su domicilio?** | **SI, DETERIORO COGNITIVO LEVE (con supervisión)/ DETERIORO COGNITIVO MODERADO/ NO, DETERIORO COGNITIVO GRAVE** |
| Impresión clínica: sin deterioro cognitivo | DETERIORO COGNITIVO: LEVE/ MODERADO/ GRAVE |
| ¿Tiene diagnóstico de deterioro cognitivo? | SI/NO |
| Grado de deterioro cognitivo | NO/ SI, LEVE-MODERADO/ SI, GRAVE |
| Test Lobo | <25 DETERIORO COGNITIVO |
| Test Pfeiffer | >5 DETERIORO COGNITIVO |
| ¿Le cuesta recordar hechos recientes, dónde deja las cosas o ha llegado a perderse? | SI/NO |
| ¿Tiene problemas en alguno de estos aspectos?  de memoria de comprensión  para expresarse con claridad  de conciencia temporal | SI, EN MÁS DE UNO O EN UNO FRECUENTEMENTE/ SI, SOLO EN UNO DE ELLOS O EN VARIOS, PERO PUNTUALMENTE/ NO |
| ¿Refiere pérdidas de memoria u otros déficits cognitivos no conocidos en el último año? | SI/NO |
| ¿El paciente o su entorno refieren empeoramiento cognitivo por causa no explicable en último año? | SI/NO |
| ¿Tiene dificultades para hacer actividades que antes realizaba porque se le olvidan: cocinar, comprar? | SI/NO |
| Test cognitivo disponible | VALOR |
| ¿Los olvidos que tienen le limitan algún aspecto de su vida (pe ej.: hacer la compra, viajar, tomar la medicación, vestirse? | ABIERTA |
| ¿Ha dejado en los últimos meses de hacer alguna actividad que hacia anteriormente (p ej.: encontrarse con amigos, comprar, prepararse la medicación)? | ABIERTA |
| Diga su nombre, dirección y número de teléfono. | Elección múltiple: |
| (1) 3 ACIERTOS |
| (2) 2 ACIERTOS |
| (3) 1 ACIERTO |
| Ordenar secuencialmente cuatro imágenes | SI/NO |
| Si se dispone de diagnóstico cognitivo, incorporar a la valoración. | VALOR |
| ¿Piensa que le falla la memoria? | SI/NO |
| ¿Tiene más dificultad para orientarse en la calle? | SI/NO |
| ¿Tiene más dificultad para organizarse en el día a día? | SI/NO |
| **EMOCIONAL** | **¿Se siente bien la mayoría de los días?  ¿Se siente inquieto o nervioso?** | **SI/ POCAS VECES/ NO** |
| ¿Está desanimado o apático? | SI/NO |
| ¿Refiere encontrarse triste o deprimido? |
| En general, ¿tiene ganas de vivir? (con o sin medicación antidepresiva |
| ¿Últimamente se siente más triste? |
| ¿Se siente con bajo estado de ánimo? |
| ¿Tiene labilidad emocional o irritabilidad? | SI/NO |
| ¿Está preocupado per alguna cosa? | SI/NO |
| ¿Se siente triste o desesperanzado? | SI/NO |
| ¿Si la necesita, tiene a quien pedir ayuda? | SI/NO |
| ¿Tiene personas con quien compartir emociones y/o sentimientos? | SI/NO |
| ¿Tiene ganas de vivir? | SI/NO |
| ¿Toma antidepresivos y/o ansiolíticos? | SI/NO |
| ¿Necesita medicación antidepresiva, insomnio o ansiedad? |
| ANSIEDAD: | SI/NO |
| 1) se irrita con facilidad |
| 2) duerme mal |
| ¿Refiere problemas de ansiedad recientemente? |
| DEPRESION: | SI/NO |
| 1) ¿Ha perdido confianza en sí mismo o interés por las cosas? |
| 2) ¿Piensa que los demás están mejor que usted? |
| ¿Refiere dificultad de conciliar el sueño? |
| Puede/quiere hablar con alguien de sus sentimientos/ emociones/ problemas? | ABIERTA |
| ¿Tiene proyectos o intereses pendientes de realizar? | ABIERTA |
| En los últimos 3 meses, ¿se ha producido algún cambio importante en sus relaciones personales? | ABIERTA |
| ¿Vive sólo?  Si la respuesta es afirmativa, preguntar:  ¿Tiene familiares o amigos que le pueden ayudar? | SI/NO |
| En una escala de 0 a 10, ¿cuán animado cree que está para hacer actividades? 0 nada animado y 10 muy animado | ESCALA de 0 a 10 |
| YESAVAGE- 5 ITEMS | VALOR |
| **SOCIAL** | **¿Existe percepción por parte de los profesionales/*familiar o vecinos* (comunidad) de situación de vulnerabilidad social?** | **SI / NO** |
| ¿Puntuación TIRS ≥ 1?  TIRS≥1 (no pondría pregunta *trigger*) | IDENTIFICAR FACTORES |
| Bajo, medio, alto | BAJO/ MEDIO/ ALTO |
| Capacidad y disponibilidad de cuidador | ABIERTA |
|
| Si vive acompañado, ¿dispone de cuidador? | SI/NO |
| Le hace falta ayuda en sus cuidados personales, situación familiar, economía, vivienda o acceso a relaciones sociales y amistades ¿? | NO/ UN POCO/ BASTANTE/ MUCHO/ DEL TODO |
| SEÑALAR ÁREA/S |
| ¿En general, se siente bien acompañado? | SI/NO |
|
| ¿Mantiene alguna relación social o familiar satisfactoria? | SI, CON FRECUENCIA/ SI, ESPORÁDICAMENTE/ NO |
| ¿Refiere tener problemas con su estado social para llevar su situación de salud? | SI/NO |
| ¿Refiere haber consultado con TSS por dificultados sociales en relación a su situación clínica? | SI/NO |
| ¿Vive solo? ¿Duerme solo? ¿Pasa solo la mayor parte del día? Si necesita apoyo de alguien ¿tiene cuidador? | SI/NO |
| ¿A quién llama cuando tiene un problema o una urgencia? | ABIERTA |
| ¿Se siente acompañado? | SI/NO |
| ¿Cómo ocupa su tiempo? | ABIERTA |
| ¿Realiza actividades con su pareja o grupo de amigos? | HABITUALMENTE/ ALGUNA VEZ/ NUNCA |
| ¿Qué aspectos le gustaría modificar de su casa (valorar disponibilidad económica para los gastos habituales, necesidad de productos de soporte,)? | ABIERTA |
| ¿Ha acudido a servicios sociales? | SI/NO |
| **CLÍNICA (ENFERMEDADES)** | **Cáncer ¿Tiene algún tipo de enfermedad oncológica activa?  Nota: sería importante saber si está en tratamiento o no** | **SI/NO** |
| ¿Enfermedad oncológica activa? | SI/NO |
| Respiratorias ¿Tiene algún tipo de enfermedad respiratoria crónica? | SI/NO |
| Enfermedad respiratória crónica (EPOC, ASMA…) | SI/NO |
| Oxígen crónico domiciliario? | SI/NO |
| Cardíacas: ¿Tiene algún tipo de enfermedad cardiaca crónica | SI/NO |
| Neurológicas ¿Tiene algún tipo de enfermedad neurológica, neurodegenerativa? | SI/NO |
| Hepáticas ¿tiene algún tipo de enfermedad hepática crónica? | SI/NO |
| Patología hepática o digestiva crónica (hepatopatía, cirrosis, pancreatitis, MII, Crohn, ...) |
| Renales ¿Tiene Insuficiencia Renal crónica (FG <60)? | SI/NO |
| ¿Tiene insuficiencia renal crónica FG< 60? |
| GMA | INDICAR NIVEL |
| GMA >, = 5 | SI/NO |
| GMA (no pondría pregunta *trigger*) | VALOR |
| PCC/MACA? | NO/PCC/MACA |
| Número de ingresos hospitalarios en el último año | VALOR |
| ¿Ha ingresado 2 o más veces en los últimos 12 meses? |
| ¿Ha tenido algún ingreso hospitalario en los últimos meses? |
|  |
| Severidad de la patología crónica | SI/NO |
| Presencia de patología invalidante | SI/NO |
| ¿Se ahoga al andar por casa? | SI/NO |
| ¿Tiene dolor habitualmente? | SI/NO |
| En relación con sus enfermedades, presenta algún síntoma (agravado o de nueva aparición) que le esté limitando a nivel físico o emocional | NO/ UN POCO/ BASTANTE/ MUCHO/ DEL TODO |
| ¿Tiene problemas de salud crónicos que requieran tratamiento? | SI, LIMITAN MI AUTONOMÍA/ SI, NO ME LIMITAN/ NO |
| ¿Ha tenido en el último trimestre alguna enfermedad que aún no ha superado completamente? | SI/NO |
| ¿Sigue el tratamiento que necesita para sus enfermedades? | SI/NO |
| ¿Una o varias enfermedades han comportado situación de empeoramiento o dificultades en el manejo del paciente? | SI/NO |
| ¿Acude a urgencias de forma repetida o lo ha hecho recientemente? | SI/NO |
| **SÍNDROMES GERIÁTRICOS y SÍNTOMAS** | **Delírium en los últimos 6 meses ¿ha presentado trastorno del comportamiento/atención que ha requerido atención médica?** | **SI / NO** |
| **¿Ha presentado algún episodio de delirio en el último año? ¿Toma neurolépticos?** |
| **Caídas** En los últimos 6 meses ¿Ha presentado ≥ 2 caídas o alguna caída que haya requerido hospitalización | SI / NO |
| ¿Ha sufrido alguna caída accidental en el último año? |  |
| Número de caídas. | >2 ALTERADO |
| **Úlceras** ¿Presenta alguna úlcera (por decúbito o vascular) de cualquier grado? | SI/NO |
| **Polifarmacia** ¿Habitualmente, toma ≥ 5 fármacos? | SI/NO |
| **Disfagia** ¿se atraganta frecuentemente cuando come o bebe? | SI/NO |
| **Dolor** ¿tiene Dolor a diario? | SI/NO |
| Presenta dolor crónico |
| Requiere de ≥ 2 analgésicos convencionales y/o opiáceos mayores para control del dolor? |
| ¿Tiene *upp* o nafras vasculares o historia previa? | SI/NO |
| ¿Tiene *upp* o nafras vasculares o historia previa? | SI/NO/HISTORIA PREVIA |
| ¿Se atraganta con líquidos o alimentos? | SI/NO |
| BMRC / NYHA 3-4? | SI/NO |
| ¿Ha caído 2 o más veces los últimos 6 meses? | SI/NO |
| ¿Recibe 5 o más fármacos?  Número de fármacos que toma  ¿Cuántos medicamentos diferentes toma usted a diario? | 4 o MÁS/ 2 o 3/ 1 o NINGUNO |
|  |  |
|  |  |
| ¿Presenta disàgia? | SI/NO |
| ¿Úlceras por presión? | SI/NO |
| ¿Se ha desorientado en el hospital o en casa últimos 6 meses? | SI/NO |
| ¿Ha presentado algún episodio o se ha agravado algún síntoma relacionado con: desorientación / confusión, caídas, necesidad de curas, problemas al tragar? ¿Cuál/es? | SI/NO |
| En el último año, ¿el paciente refiere haber presentado alguna caída o consta alguna caída? |
| Ha estado ingresado o atendido durante el último semestre por:  Delirium, Úlceras, Caídas, Disfagia | SI, POR MÁS DE UNA DE ESTAS CIRCUNSTANCIAS/ SI, POR UNA SOLA/ NO |
| En el último año, ¿el paciente ha presentado un episodio de delírium relacionado con un proceso agudo o una hospitalización? | SI/NO |
| ¿Refiere algún síntoma que le interfiere en su calidad de vida? | SI/NO |
| Deambulación | SI/NO |
| ¿Problemas esfínteres? | SI/NO |
| ¿Problemas visión o audición? | SI/NO |
| **DISNEA** ¿La disnea basal le impide salir de casa y/o que requiere de opiáceos habitualmente? | SI/NO |
| **ATENCIÓN CLÍNICA URGENTE** | **¿Ha sido atendido ≥ 2 ocasiones por el servicio de urgencias hospitalario en los últimos 6-12 meses?** | **SI/NO** |
| **FRAGILIDAD** | ESCALA FRAIL (esta preferentemente si no fuera porque se ha escogido el *Gérontopole* para el *screening* en el APTITUDE; nos parece más sencilla y rápida) | VALOR |
| *Gérontopole* *frailty screening tool* | VALOR |
| **Cumplimiento terapéutico** | ¿conoce la medicación que toma y la manera de hacerlo? | SI/NO |
| ¿tienen alguien que se la administre si no es capaz? | SI/NO |
| **RIESGOS/ SEGURIDAD** | ¿cree que puede tener riesgo para conducir vehículos? | SI/NO |
| ¿cree que puede tener riesgo para manipular gas al cocinar o para calentarse? | SI/NO |
| ¿cree que puede tener riesgo por el hecho de estar solo? | SI/NO |

**Anexo F**. PROPUESTA FINAL DE CONSENSO DE HERRAMIENTA DE VMGR (VIG-EXPRESS)

|  |  | **PREGUNTAS TRIGGER** |  | RESPUESTA | INTERPRETACIÓN | PUNTUACIÓN EQUIVALENTE AL IF-VIG  *(NP: no puntúa)* |
| --- | --- | --- | --- | --- | --- | --- |

| **CLÍNICO** |  | **1 ¿**Tiene **alguna enfermedad crónica?**  ** a partir de la revisión de su historia clínica y/o anamnesis con la persona/entorno cuidador* |  | **NO** | **0** | | | | |
| --- | --- | --- | --- | --- | --- | --- | --- | --- | --- |
| **SÍ** | *DESPLEGABLE* ⇓ | | | | |
| **Cáncer** | ¿Tiene algún tipo de **enfermedad oncológica activa**? | No | 0 |
| Sí | 1 |
| Sí++ | 2 |
| **Respi-ratorio** | ¿Tiene algún tipo de **enfermedad respiratoria crónica** (EPOC, neumopatía restrictiva,...)? | No | 0 |
| Sí | 1 |
| Sí++ | 2 |
| **Cardía-cas** | ¿Tiene algún tipo de **enfermedad cardíaca crónica** (Insuficiencia cardíaca, cardiopatía isquémica, arritmia)? | No | 0 |
| Sí | 1 |
| Sí++ | 2 |
| **Neuro-lógico** | ¿Tiene algún tipo de **enfermedad neurodegenerativa** (Enfermedad de Parkinson, ELA,...) o antecedente de **accidente vascular** **cerebral** (isquémico o hemorrágico)? | No | 0 |
| Sí | 1 |
| Sí++ | 2 |
| **Diges-tivo** | ¿Tiene algún tipo de **enfermedad digestiva crónica** (hepatopatía crónica, cirrosis, pancreatitis crónica, enfermedad inflamatoria intestinal,…)? | No | 0 |
| Sí | 1 |
| Sí++ | 2 |
| **Renal** | ¿Tiene insuficiencia renal crónica (**FG < 60**)? | No | 0 |
| Sí | 1 |
|  | Sí++ | 2 |

| **PRESCRIPCIÓN**  **FARMACÉUTICA** |  | **2 ¿Toma ≥ 5 fármacos?**  **mediante la revisión de la medicación recetada y/o anamnesis con la persona/entorno cuidador* |  | **NO** | *Ausencia de polifarmacia* | | **0** | |  |
| --- | --- | --- | --- | --- | --- | --- | --- | --- | --- |
| **SÍ** | *Presencia de polifarmacia* | | **1** | |
|  |  |  |  | | | |
|  | **3 ¿A veces se olvida de tomar las medicinas?**  ** a partir de la anamnesis con la persona y/o percepcion del entorno cuidador / profesional* |  | **NO** | *Ausencia de problemas de adherencia* | NP | |
| **SÍ** | *Probables dificultades con la adherencia* |

| **NUTRICIO-NAL** |  | **4 ¿**A lo largo de los últimos meses **ha perdido peso de forma involuntaria** *(por ejemplo: la ropa ahora le va ancha)*y/o **ha perdido el apetito?**  ** corroborado por un observador externo (entorno cuidador y/o profesionales)* |  | **NO** | *Ausencia de malnutrición* | 0 |
| --- | --- | --- | --- | --- | --- | --- |
| **SÍ** | *Probable malnutrición* | **1** |
|  |  |  |

| **SÍNTOMAS** |  | **5 ¿**Habitualmente **el dolor o el ahogo interfieren** en su **vida diaria?**  (y/o requieren de al menos 2 analgésicos u opiáceos para su control)    *** *a partir de la anamnesis con la persona y/o percepción del entorno cuidador / profesional* |  | **NO** | *Ausencia de síntomas* | | | **0** | |
| --- | --- | --- | --- | --- | --- | --- | --- | --- | --- |
| **SÍ** | *DESPLEGABLE* ⇓ | | | | |  | |
| **Dolor** | ¿El dolor **interfiere en sus actividades y**/o requiere de **≥ 2 analgésicos** convencionales y/o **opiáceos** **mayores** para su control? | No | | 0 | |
| **Sí** | | **1** | |
| **Disnea** | ¿La disnea basal **interfiere en sus actividades y**/o requiere de **opiáceos** habitualmente? | No | | 0 | |
| **Sí** | | **1** | |

| **SD GERIÁTRICOS** |  | **6** ¿A lo largo de los últimos 6 meses, **ha presentado alguno** de los siguientes problemas?  **síndrome confusional, caídas, úlceras, disfagia, incontinencia o estreñimiento**  ** a partir de la revisión de su historia clínica y/o anamnesis con la persona / entorno cuidador* |  | **NO** | *Ausencia de síndromes geriátricos* | | | | **0** | | | | | |
| --- | --- | --- | --- | --- | --- | --- | --- | --- | --- | --- | --- | --- | --- | --- |
| **SÍ** | *DESPLEGABLE* ⇓ | | |  | | | | | | |
| **Sd. Confu-sional** | Los últimos 6 meses, ¿ha presentado síndrome confusional y/o trastornos del comportamiento, que hayan requerido de neurolépticos? | No | | 0 | | | | |
| Sí | | 1 | | | | |
| **Caídas** | Los últimos 6 meses, ¿ha presentado ≥2 caídas o alguna caída que haya requerido de hospitalización? | No | | | | 0 | | | |
| Sí | | | | 1 | | | |
| **Úlceras** | ¿Presenta alguna úlcera(relacionada con su situación de dependencia y/o de origen vascular, de cualquier grado) y/o herida crónica? | No | | | | | 0 | | |
| Sí | | | | | 1 | | |
| **Disfagia** | ¿Se atraganta habitualmente cuando come o bebe? y/o en los últimos 6 meses, ¿ha presentado alguna infección respiratoria por aspiración? | No | | | 0 | | | | | |
| Sí | | | 1 | | | | | |
| **Inconti-nencia** | ¿Presenta incontinencia (urinaria o fecal) que requiera de medidas específicas? | No | | | | | NP | | | | |
| Sí | | | | |
| **Estreñi-miento** | ¿Hace < 3 deposiciones a la semana y/o le cuesta evacuar y/o necesita de medidas / tratamiento específicos? | No | | | | | NP | | | | |
| Sí | | | | | |  | | | | |

| **SENSORIAL** |  | **7 ¿**Tiene **problemas de visión** que le **dificulten el día a día?***(a pesar de medidas correctoras -gafas, ...-)*  ** a partir de la anamnesis con la persona y/o percepción del entorno cuidador / profesional* |  | **NO** | *Ausencia de problemática visual significativa* | | | NP | | |
| --- | --- | --- | --- | --- | --- | --- | --- | --- | --- | --- |
| **SÍ** | *Posible problemática visual -a valorar con escala básica de soporte-* | | |
|  | | | | |
|  |  |  |  |  | | | | | |
| **8 ¿**Tiene **problemas de audición** que le **dificulten el día a día?****(***a pesar de medidas correctoras -audiófonos-)*  ** a partir de la anamnesis con la persona y/o percepción del entorno cuidador/profesional* |  | **NO** | *Ausencia de problemática auditiva significativa* | | | NP | | |
| **SÍ** | *Posible problemática auditiva a valorar con escala básica de soporte* | | |
|  |  | |  | | |

| **FUNCIONAL** |  | **9 ¿**Sería **capaz de vivir solo sin ayuda?**  ** corroborado por un observador externo (entorno cuidador y/o profesionales)* |  | **SÍ** | *Autónomo para ABVDs y AIVDs* | | | | | **0** | | | | | | |
| --- | --- | --- | --- | --- | --- | --- | --- | --- | --- | --- | --- | --- | --- | --- | --- | --- |
| **NO** | *DESPLEGABLE* ⇓ | | | | | | | | | |
| AIVDs | Manejo del **dinero** | ¿Necesita ayuda para gestionar los temas económicos (banco, tiendas, restaurantes)? | No | | | 0 | | | | |
| Sí | | | 1 | | | | |
| Uso del **teléfono** | ¿Necesita ayuda para utilizar autónomamente el teléfono? | No | | | | 0 | | | |
| Sí | | | | 1 | | | |
| Control de **medi-cación** | ¿Necesita ayuda para preparar/tomarse la medicación? | | No | | | | 0 | | |
| Sí | | | | 1 | | |
| ABVDs | 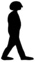 | No dependencia para ABVDs  *(por ejemplo, IB ≥ 95)* | | | | | | | 0 | | |
| *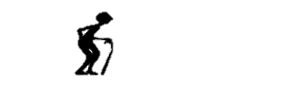* | Dependencia leve-moderada  *(por ejemplo, IB 90-65)* | | | | | | | 1 | |
| 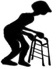 | Dependencia moderada-grave  *(por ejemplo, IB 60-25)* | | | | | | | 2 | |
| 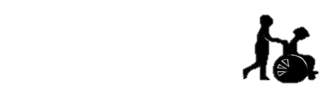 | Dependencia absoluta  *(por ejemplo, IB ≤20) ?* | | | | | | | 3 | |

| **COGNITIVO** |  | **10** ¿Tiene **problemas de memoria** que interfieran en su día a día y/o en latoma de decisiones?  ** corroborado por un observador externo (entorno cuidador y/o profesionales)* |  | **NO** | *Ausencia de deterioro cognitivo* | 0 | |
| --- | --- | --- | --- | --- | --- | --- | --- |
| **SÍ** | *DESPLEGABLE* ⇓ | |
| ¿Deterioro cognitivo leve-moderado (equivalente a GDS ≤5)? | 1 | |
| ¿Deterioro cognitivo grave-muy grave (equivalente a GDS ≥ 6)? | 2 | |

| **EMOCIONAL** |  | **11** A lo largo del últimomes **¿se ha sentido frecuentemente triste o ha perdido interés para realizar actividades?***y/o ¿necesita habitualmente tomar medicación antidepresiva?*  **a partir de la anamnesis con la persona y/o percepción del entorno cuidador/profesional* |  | **NO** | | *Ausencia de sintomatología depresiva* | | | 0 | | |
| --- | --- | --- | --- | --- | --- | --- | --- | --- | --- | --- | --- |
| **SÍ** | | *Probable síndrome depresiva* | | | 1 | | |
|  | | | | | | |
|  |  |  | | |  |  | |
| **12** A lo largo del últimomes **¿se ha sentido nervioso** y/o **le cuesta dormir?** *y/o ¿necesita habitualmente tomar ansiolíticos / hipnóticos?*  **a partir de la anamnesis con la persona y/o percepción del entorno cuidador/profesional* |  | **NO** | *Ausencia de ansiedad / insomnio* | | | 0 | | | |
| **SÍ** | *Probable ansiedad / insomnio* | | | 1 | | | |
|  |  | | |  | | | |

| **SOCIAL** |  | **13 ¿**Existe **percepción*** de **problemas** en **la vivienda** *(no adaptada a sus necesidades,...)* o de **problemas económicos** *(la persona tiene dificultades para llegar a final de mes, pasa frío en casa, hay posibilidades de pérdida de la vivienda,...)***?**  ** Percepción por parte del/la profesional* | |  | | **NO** | | | *Ausencia de problemas económicos o de vivienda* |  | |  |
| --- | --- | --- | --- | --- | --- | --- | --- | --- | --- | --- | --- | --- |
| **SÍ** | | | *Probable presencia de problemas económicos o de vivienda* |
|  | | | |
|  | |  | |  | | |  |  | |
| **14** ¿Pasa la **mayor parte del día solo** y/o tiene dificultades para realizar **actividades de ocio**(*salir a pasear, participar en actividades lúdicas, recibir visitas u otras actividades relacionales -según las circunstancias de cada persona-)* con familiares o amigos**?** **a partir de la anamnesis con la persona y/o percepción del entorno cuidador/profesional* | |  | | **NO** | | *Ausencia de problemas en actividades relacionales, sociales y de participación* | | **0** | 1  (Si respuesta positiva a cualquiera de las 3 cuestiones) | |
| **SÍ** | | *Presencia de problemas en actividades relacionales, sociales y de participación* | |
|  | |  | |
|  |  |  | |  | |  |  | |
|  | **15** ¿Tiene dificultades para **saber a quién acudir** cuando **necesita ayuda?** **a partir de la anamnesis con la persona y/o percepción del entorno cuidador/profesional* | |  | | **NO** | | *Ausencia de problemas de soporte* | |
|  |  | | **SÍ** | | *Probables problemas de soporte por parte de familiares, cuidadores, ...* | |  | |

*
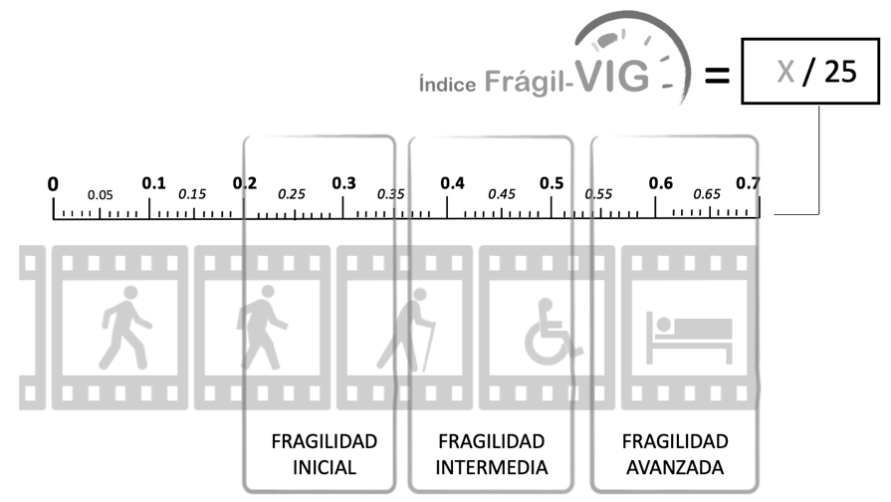
*

*Especialmente para personas identificadas como* ***PCC /MACA****, valorar preguntar a la persona sobre:*

| **INFORMACIÓN Y PREFERENCIAS** |  | **16**  **Sobre su situación de salud, ¿piensa que se tienen suficientemente en cuenta sus opiniones y preferencias?** * en relación a: la información que desea, el tratamiento a recibir y el lugar donde fue tratado o las disposiciones en caso de mala evolución |  | **SÍ** |  |
| --- | --- | --- | --- | --- | --- |
| **NO** | *Riesgo de falta de información o de participación de la persona en la toma de decisiones* |
|  |  |

| **ESPIRI-TUALIDAD** |  | **17** ¿**Se ve con fuerzas** para afrontar el futuro? |  | **SÍ** |  |
| --- | --- | --- | --- | --- | --- |
| **NO** | *Riesgo de problemática a nivel existencial* |
|  |
